# Supplementary material for: Chlorine determination in cement paste samples using laser-induced breakdown spectroscopy and non-matching matrix calibration samples
Source: Royal Society of Chemistry journal article supplement (doi:10.1039/d4ja00370e), 2025-01-01
Supplement: d4ja00370e1.pdf [file d4ja00370e1.pdf]

## APPENDIX

### Reliability coefficient $R^2$ :

$$R^2 = 1 - \frac{SS_{res}}{SS_{tot}},$$

$$SS_{tot} = \sum_i (y_i - \bar{y})^2,$$

$$SS_{res} = \sum_i (y_i - f_i)^2,$$

where  $y_i$  is the  $i$ -th value from the observed dataset,  $\bar{y}$  is the mean of observed data,  $f_i$  is the predicted value associated with  $y_i$ .  $SS_{tot}$  is the total sum of squares (proportional to the variance of the data) and  $SS_{res}$  is the sum of squares of residuals.

### Prediction of $x$ from $y$ :

$$\hat{x}_s = \frac{\bar{y}_s - b_0}{b_1},$$

where  $\hat{x}_s$  is the predicted concentration,  $\bar{y}_s$  is the mean of  $m$  determinations performed on the sample,  $b_0$  is the intercept and  $b_1$  is the slope of calibration curve equation.

$$s_{\hat{x}_s} = \frac{s_e}{b_1} \sqrt{\frac{1}{m} + \frac{1}{n} + \frac{(\bar{y}_s - \bar{y})^2}{b_1^2 \sum (x_i - \bar{x})^2}},$$

where  $s_e$  is an estimate of the variance of the measurements,  $m$  is the number of measurements per sample,  $n$  is the number of points of the calibration curve,  $\bar{y}$  is the mean of all the  $y$  observations (grand mean),  $x_i$  is the  $i$ -th value from the observed dataset and  $\bar{x}$  is the mean of all the  $x$  observations (grand mean).

### Sum of the mean squares of prediction error:

$$\sum_j^k (x_j - \hat{x}_j)^2,$$

where  $x_j$  is the reference content of  $j$ -th sample and  $\hat{x}_j$  is the value of the predicted content of the respective sample.
